# Supplementary material for: A New Stilbene Glucoside from Biotransformation-Guided Purification of Chinese Herb Ha-Soo-Oh
Source: MDPI journal article supplement (doi:10.3390/plants11172286), 2022-09-01
Supplement: s1 [file s1]

## Supplemental Materials

# A New Stilbene Glucoside from Biotransformation-Guided Purification of Chinese Herb Ha-Soo-Oh

Jiumn-Yih Wu <sup>1,†</sup>, Hsiou-Yu Ding <sup>2,†</sup>, Tzi-Yuan Wang <sup>3,†</sup>, Min-Hui Hsu <sup>4</sup> and Te-Sheng Chang <sup>4,\*</sup>

<sup>1</sup> Department of Food Science, National Quemoy University, Kinmen County 892, Taiwan

<sup>2</sup> Department of Cosmetic Science, Chia Nan University of Pharmacy and Science, No. 60 Erh-Jen Rd., Sec. 1, Tainan 71710, Taiwan

<sup>3</sup> Biodiversity Research Center, Academia Sinica, Taipei 11529, Taiwan

<sup>4</sup> Department of Biological Sciences and Technology, National University of Tainan, Tainan 70005, Taiwan

\* Correspondence: mozyme2001@gmail.com; Tel./Fax: +886-6-2602137

† These authors contributed equally to this work.

## Contents

**Table S1.**  $^{13}\text{C}$ - and  $^1\text{H}$ -NMR spectral data and HMBC, NOESY correlations of compounds (**1**)<sup>a</sup>. (DMSO- $d_6$ )

**Figure S1.** The high-resolution mass analysis of PSG (**1**) at the negative mode. A significant signal at  $m/z$  421.1129.

**Figure S2.**  $^1\text{H}$ -NMR spectrum (700 MHz, DMSO- $d_6$ ) of the PSG (**1**).

**Figure S3.**  $^{13}\text{C}$ -NMR spectrum (175 MHz, DMSO-  $d_6$ ) of the PSG (**1**).

**Figure S4.** DEPT-NMR spectrum (175 MHz, DMSO- $d_6$ ) of the PSG (**1**).

**Figure S5.**  $^1\text{H}$ - $^{13}\text{C}$  HSQC-NMR spectrum (700 MHz, DMSO- $d_6$ ) of the PSG (**1**).

**Figure S6.**  $^1\text{H}$ - $^{13}\text{C}$  HMBC-NMR spectrum (700 MHz, DMSO- $d_6$ ) of the PSG (**1**).

**Figure S7.**  $^1\text{H}$ - $^1\text{H}$  COSY-NMR spectrum (700 MHz, DMSO- $d_6$ ) of the PSG (**1**).

**Figure S8.**  $^1\text{H}$ - $^1\text{H}$  NOESY-NMR spectrum (700 MHz, DMSO- $d_6$ ) of the PSG (**1**).

**Figure S9.** The high-resolution mass analysis of TSG at the negative mode. A significant signal at  $m/z$  405.1180.

**Table S1.** <sup>13</sup>C- and <sup>1</sup>H-NMR spectral data and HMBC, NOESY correlations of compounds (1)<sup>a</sup>. (DMSO-*d*<sub>6</sub>)

| position | δ <sub>C</sub> | δ <sub>H</sub> (δ in ppm, <i>J</i> in Hz) | HMBC             | NOESY                  |
|----------|----------------|-------------------------------------------|------------------|------------------------|
| 1        | 129.1          |                                           | H-7, 8           |                        |
| 2        | 136.3          |                                           | H-4, 6, 7, 1''   |                        |
| 3        | 150.5          |                                           | H-4              |                        |
| 4        | 102.6          | 6.17 (d, <i>J</i> =2.8)                   | H-6              |                        |
| 5        | 154.6          |                                           | H-4, 6           |                        |
| 6        | 101.0          | 6.53 (d, <i>J</i> =2.8)                   | H-4, 7           | H-6/H-8                |
| 7        | 120.4          | 7.61 (d, <i>J</i> =16.5)                  | H-6, 8           | H-7/H-8, 2', 6', 1''   |
| 8        | 131.9          | 6.80 (d, <i>J</i> =16.5)                  |                  | H-8/H-6, 7, 2'         |
| 1'       | 128.7          |                                           | H-7, 2', 5', 6'  |                        |
| 2'       | 113.8          | 7.00 (d, <i>J</i> =2.1)                   | H-8, 6'          | H-2'/H-7, 8, 2''       |
| 3'       | 145.2          |                                           | H-2', 5'         |                        |
| 4'       | 145.4          |                                           | H-2', 5', 6'     |                        |
| 5'       | 115.7          | 6.70 (d, <i>J</i> =7.7)                   | H-6'             | H-5'/ H-6', 2''        |
| 6'       | 118.6          | 6.90 (dd, <i>J</i> =2.1, 7.7)             | H-8, 2'          | H-6'/H7, 5', 2'', 6b'' |
| 1''      | 106.5          | 4.41 (d, <i>J</i> =7.7)                   | H-2'', 3'', 5''  | H-1''/ H-3'', 5''      |
| 2''      | 74.0           | 3.36, (m)                                 | H-1'', 3'', 4''  | H-2''/ H-4''           |
| 3''      | 76.1           | 3.28, (m) <sup>b</sup>                    | H-1'', 2'', 4''  | H-3''/H-1'', 5''       |
| 4''      | 69.4           | 3.26, (m) <sup>b</sup>                    | H-3'', 5'', 6b'' | H-4''/ H-2'', 6a''     |
| 5''      | 77.1           | 3.22, (m)                                 | H-1'', 4'', 6a'' | H-5''/ H-1'', 6b''     |
| 6''      | 60.7           | 3.55, (m)                                 | H- 4''           | H-6a''/ H-4'', 6b''    |
|          |                | 3.68, (m)                                 |                  | H-6b''/ H-5'', 6a''    |

<sup>a</sup> <sup>1</sup>H NMR data was determined on 700 MHz spectrometer and <sup>13</sup>C NMR data on 175 MHz spectrometer.<sup>b</sup> Overlapping

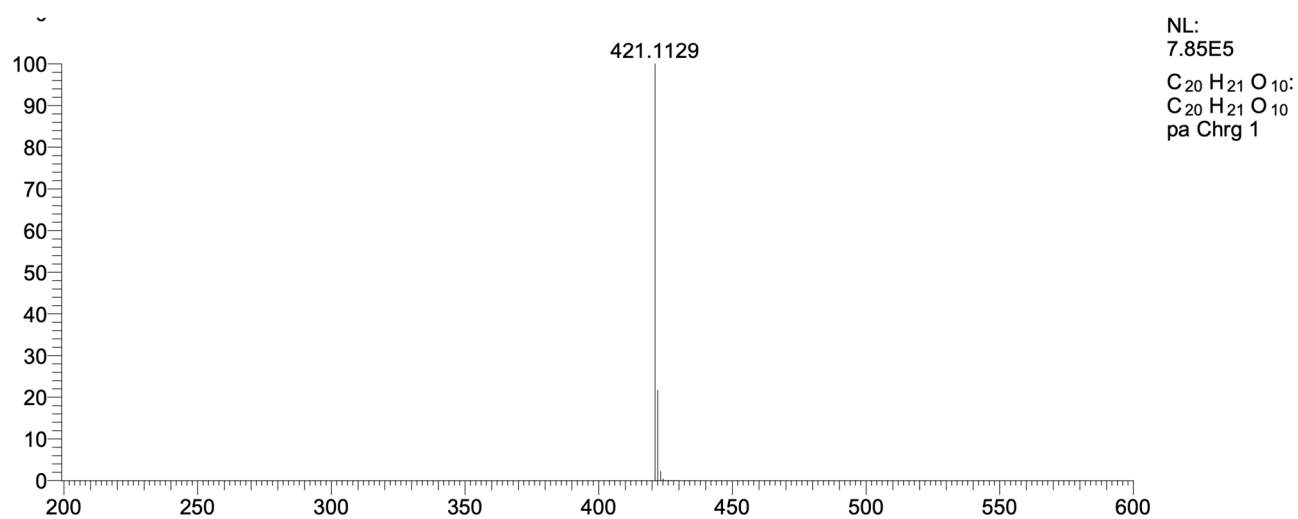

**Figure S1.** The high-resolution mass analysis of PSG (1) at the negative mode. A significant signal at  $m/z$  421.1129.

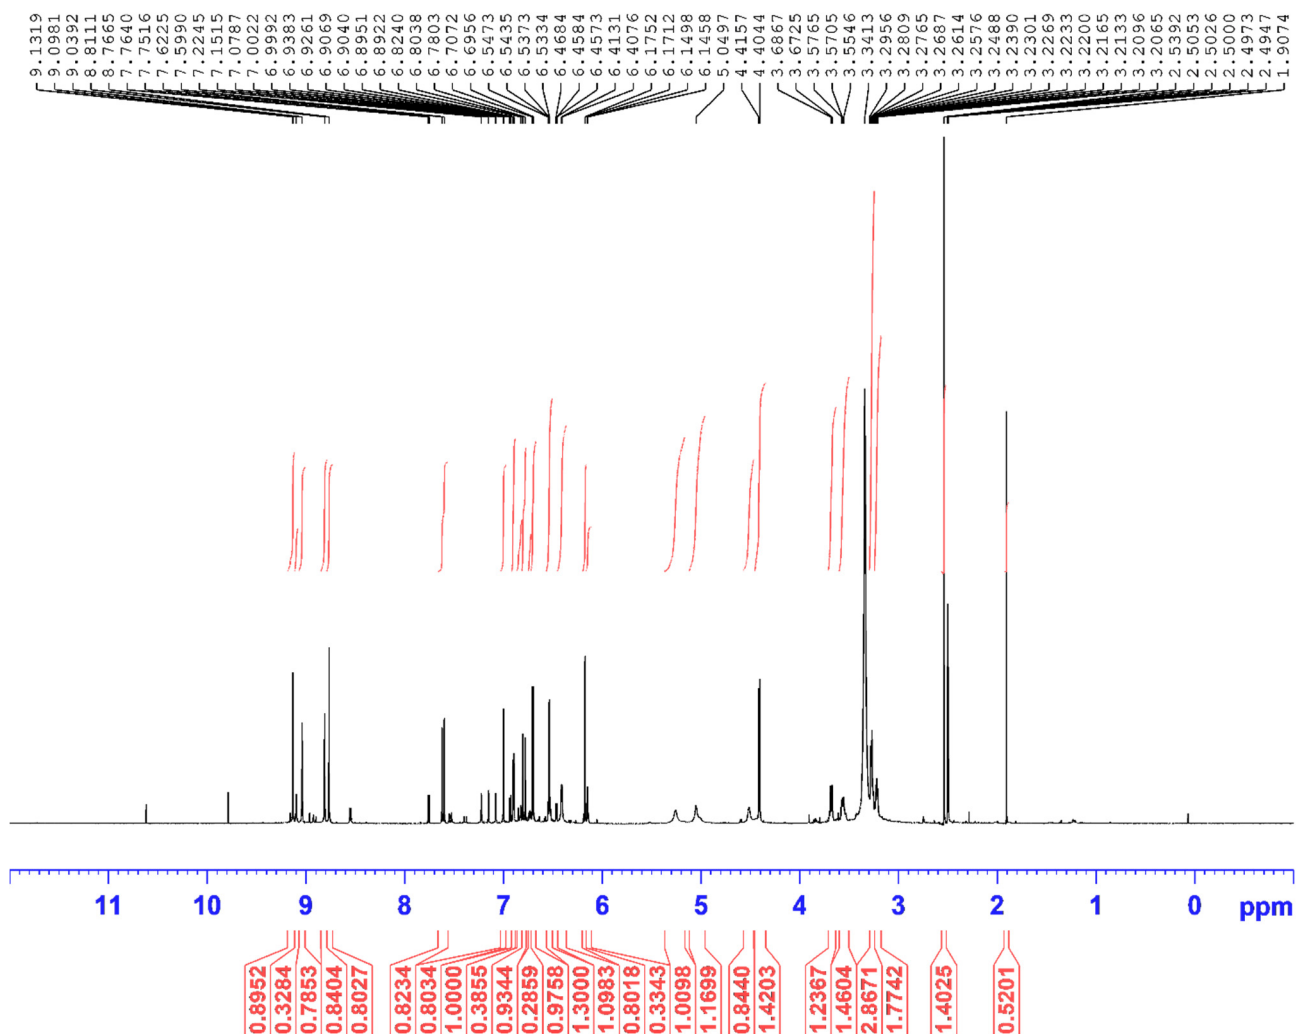

Figure S2.  $^1\text{H}$ -NMR spectrum (700 MHz,  $\text{DMSO}-d_6$ ) of the PSG (1).

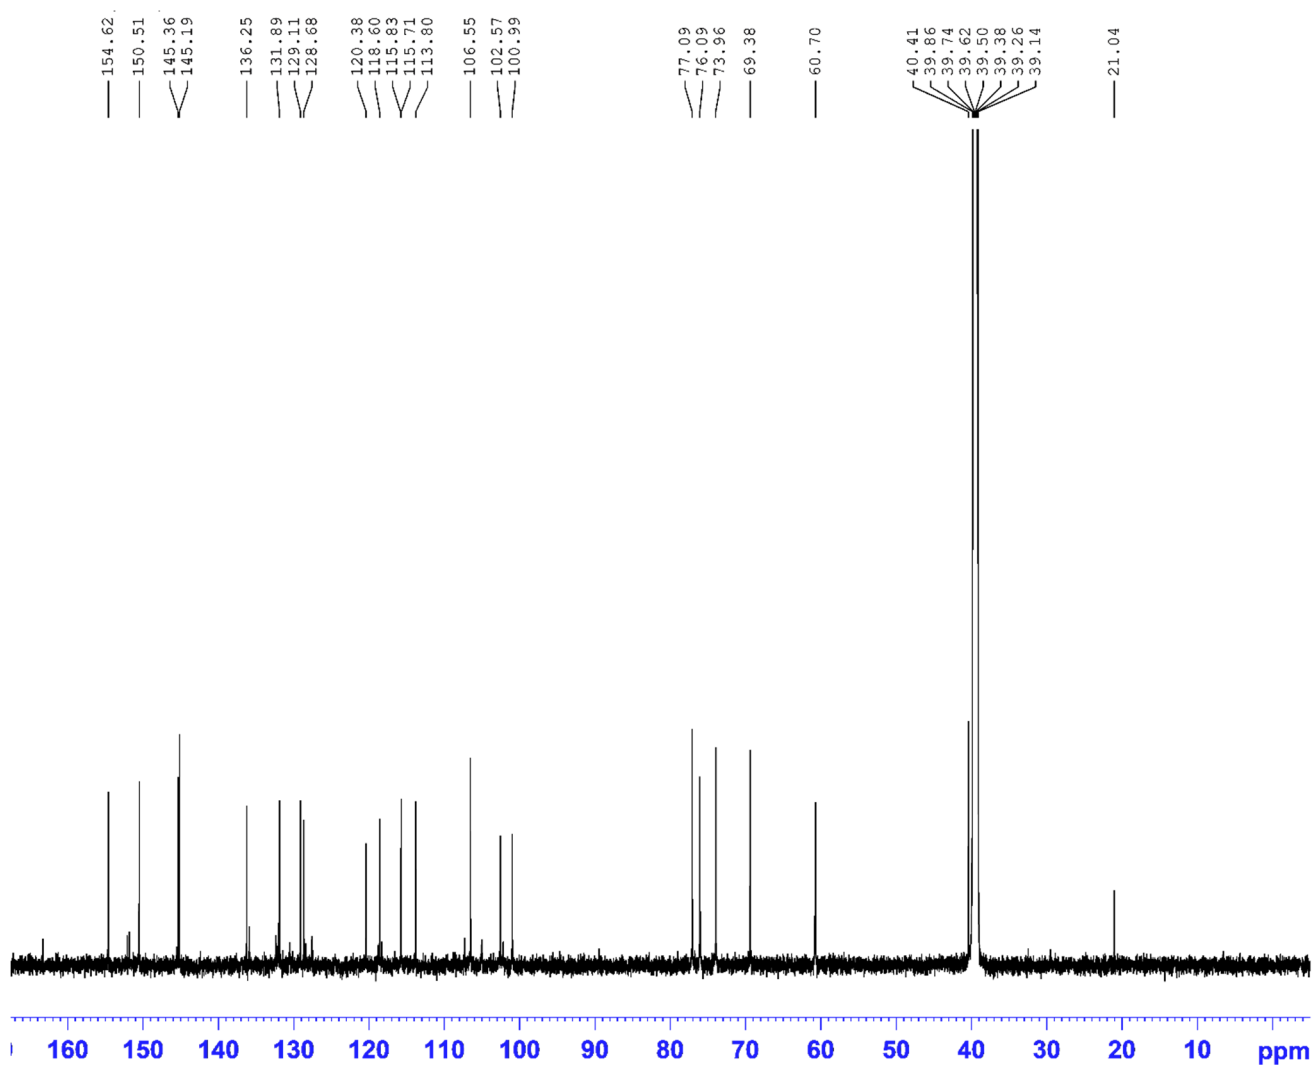

Figure S3. <sup>13</sup>C-NMR spectrum (175 MHz, DMSO-*d*<sub>6</sub>) of the PSG (1).

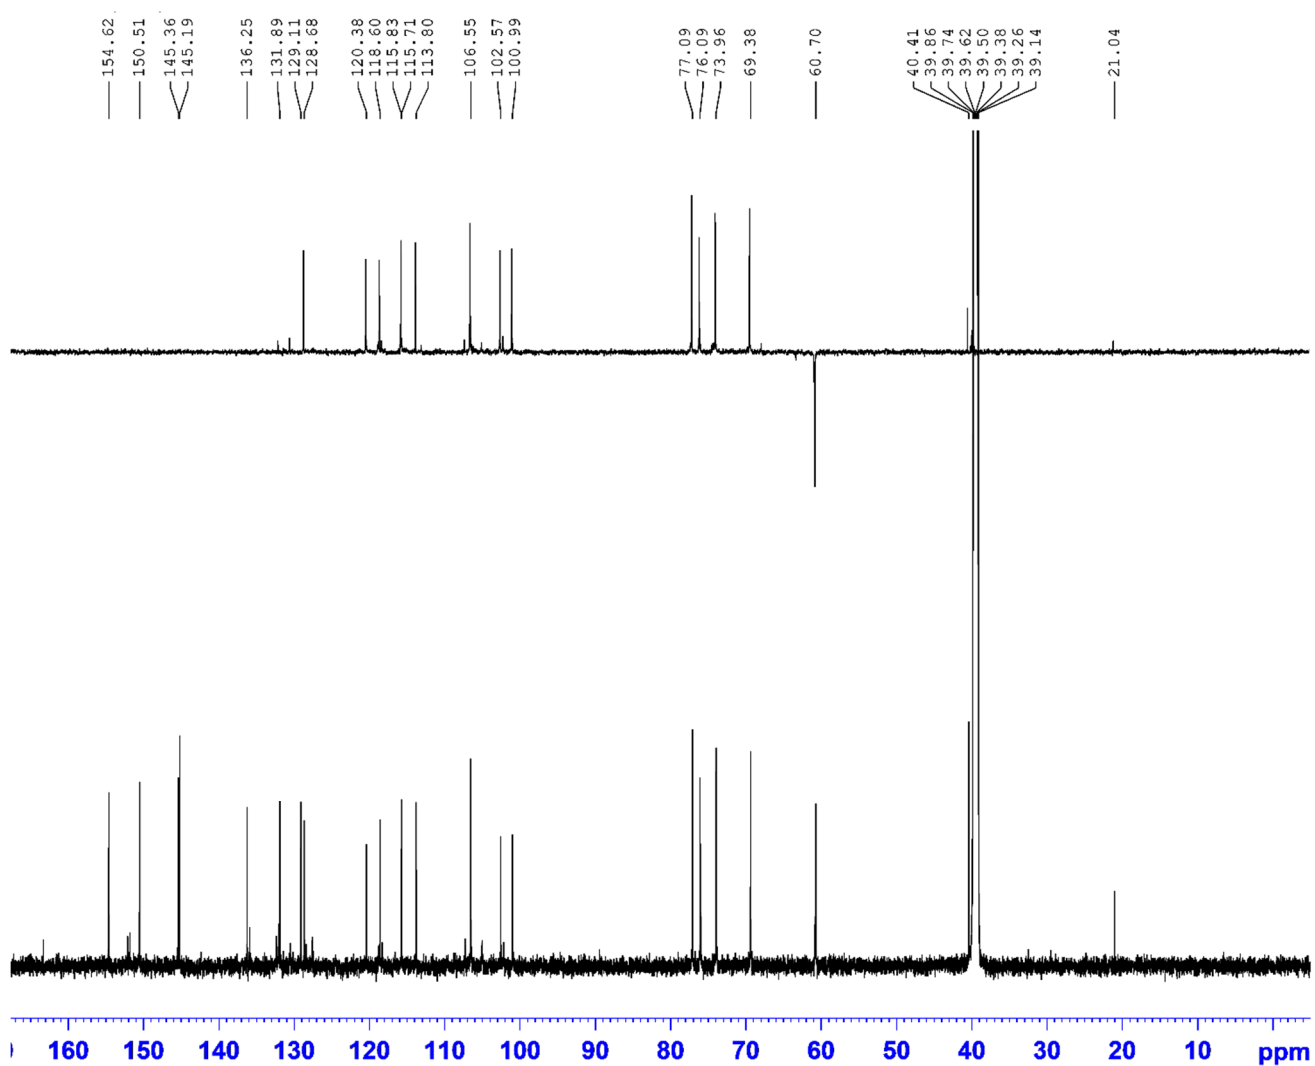

Figure S4. DEPT-NMR spectrum (175 MHz, DMSO- $d_6$ ) of the PSG (1).

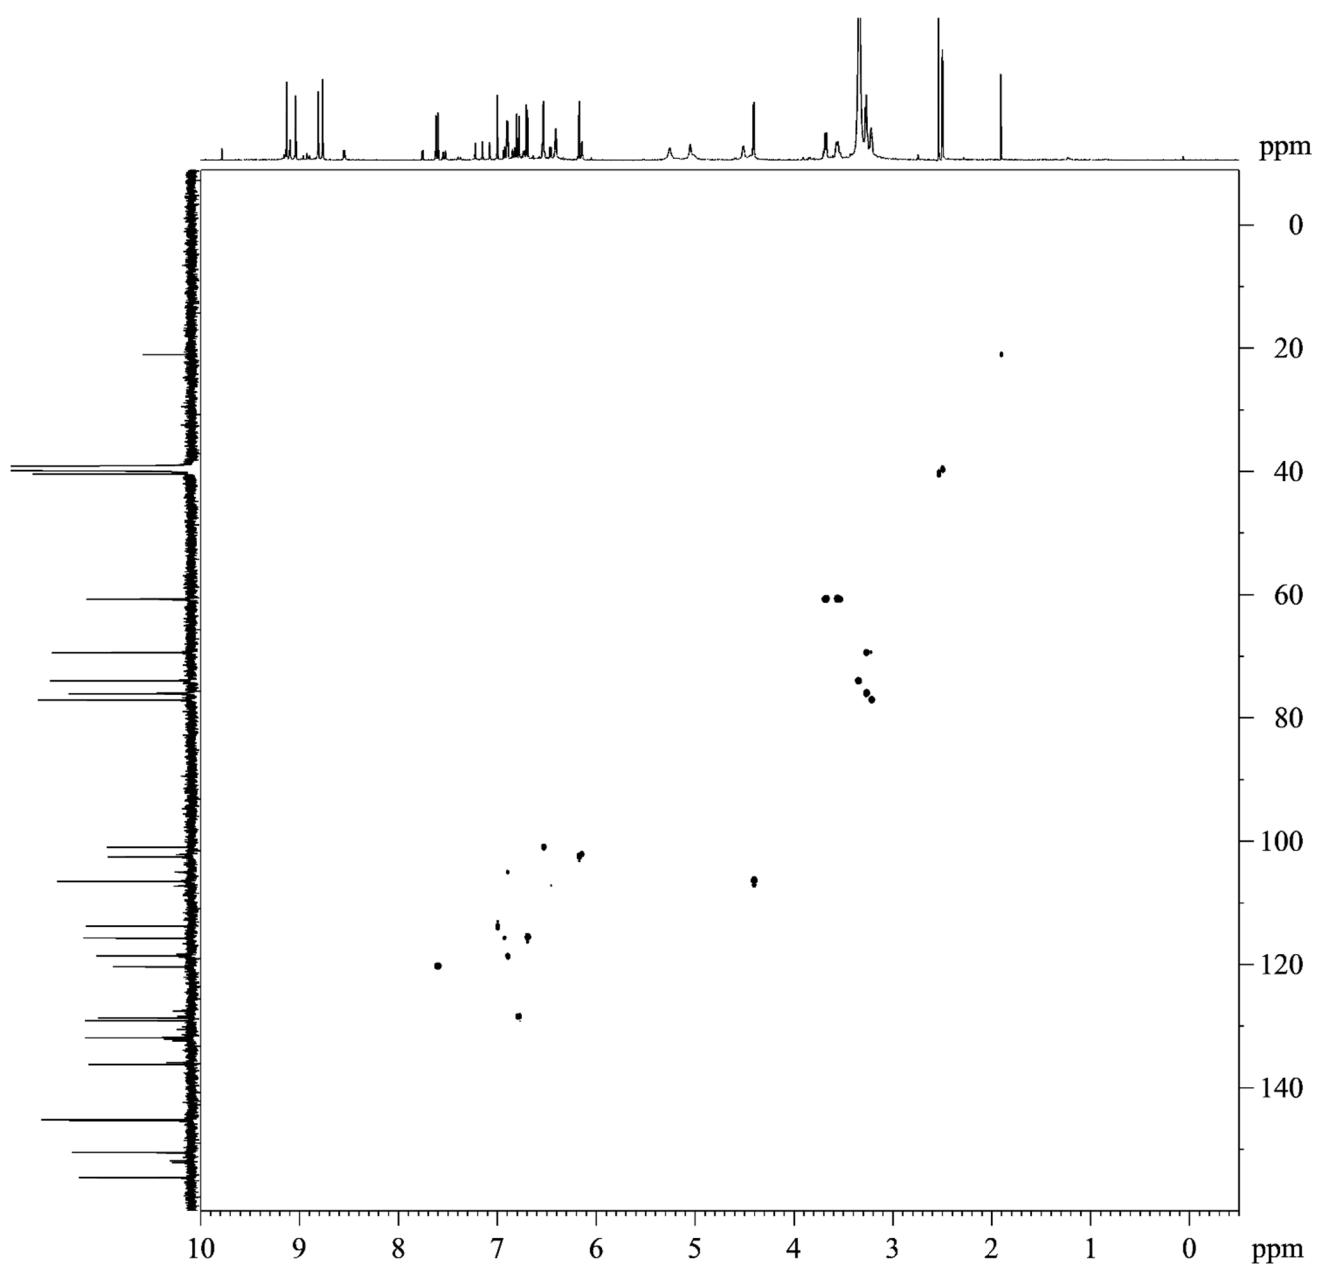

**Figure S5.**  $^1\text{H}$ - $^{13}\text{C}$  HSQC-NMR spectrum (700 MHz,  $\text{DMSO}-d_6$ ) of the PSG (**1**).



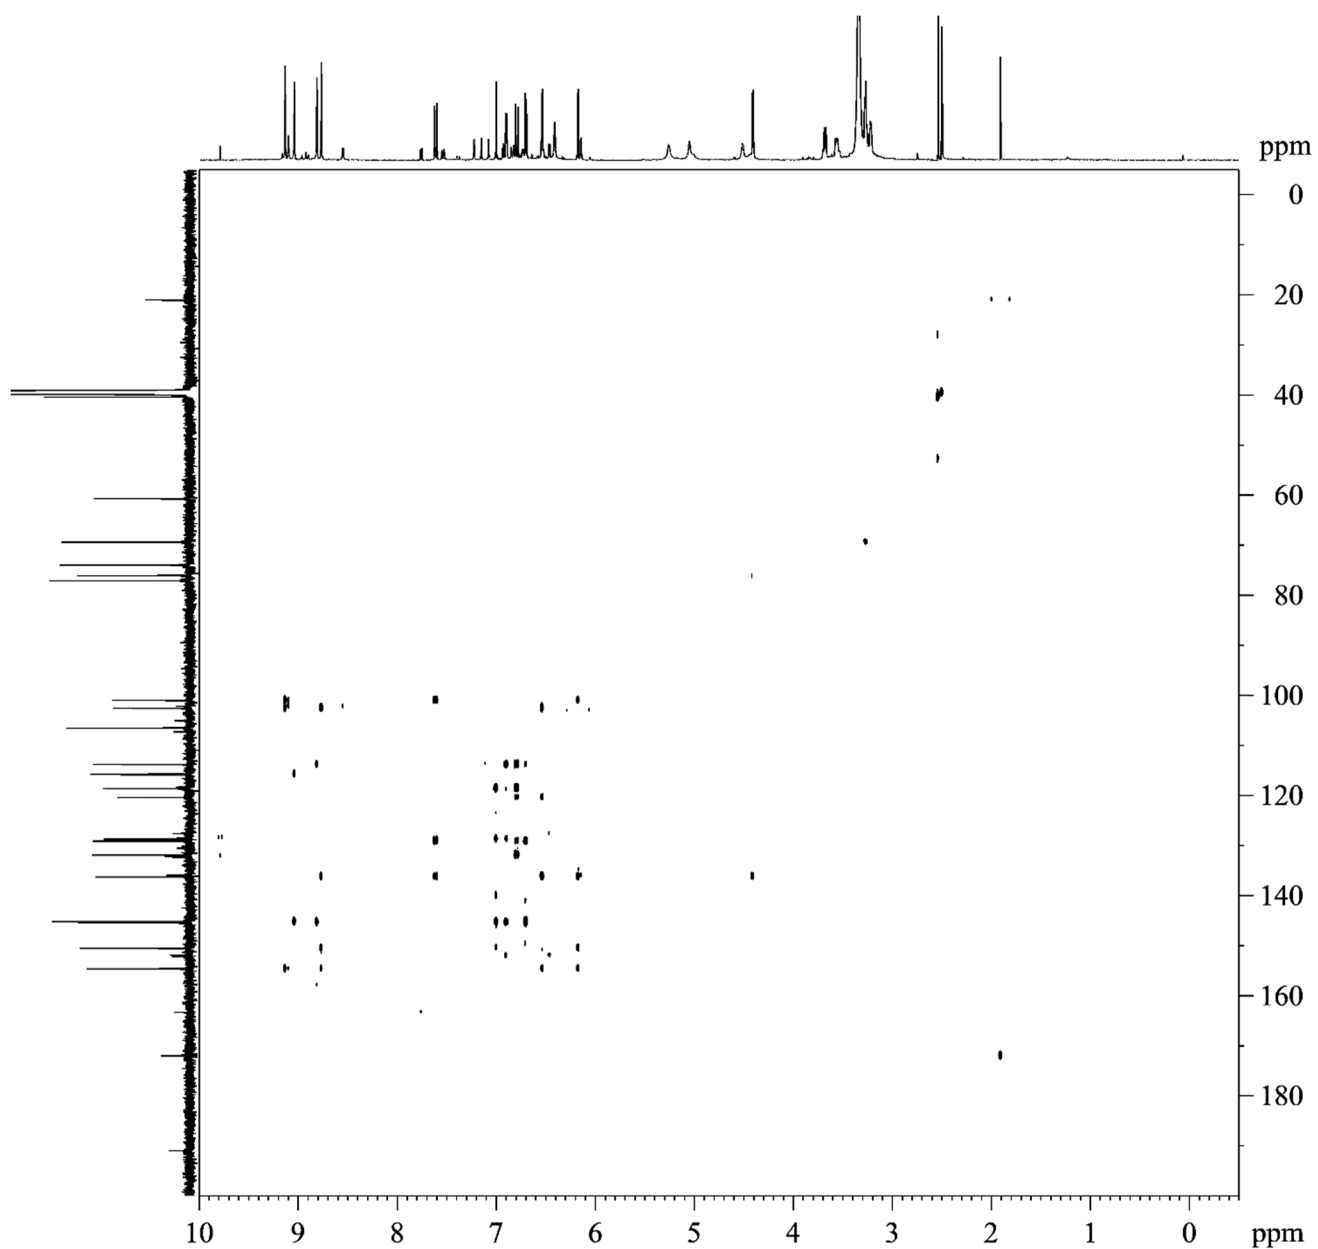

**Figure S6.**  $^1\text{H}$ - $^{13}\text{C}$  HMBC-NMR spectrum (700 MHz,  $\text{DMSO}-d_6$ ) of the PSG (1).

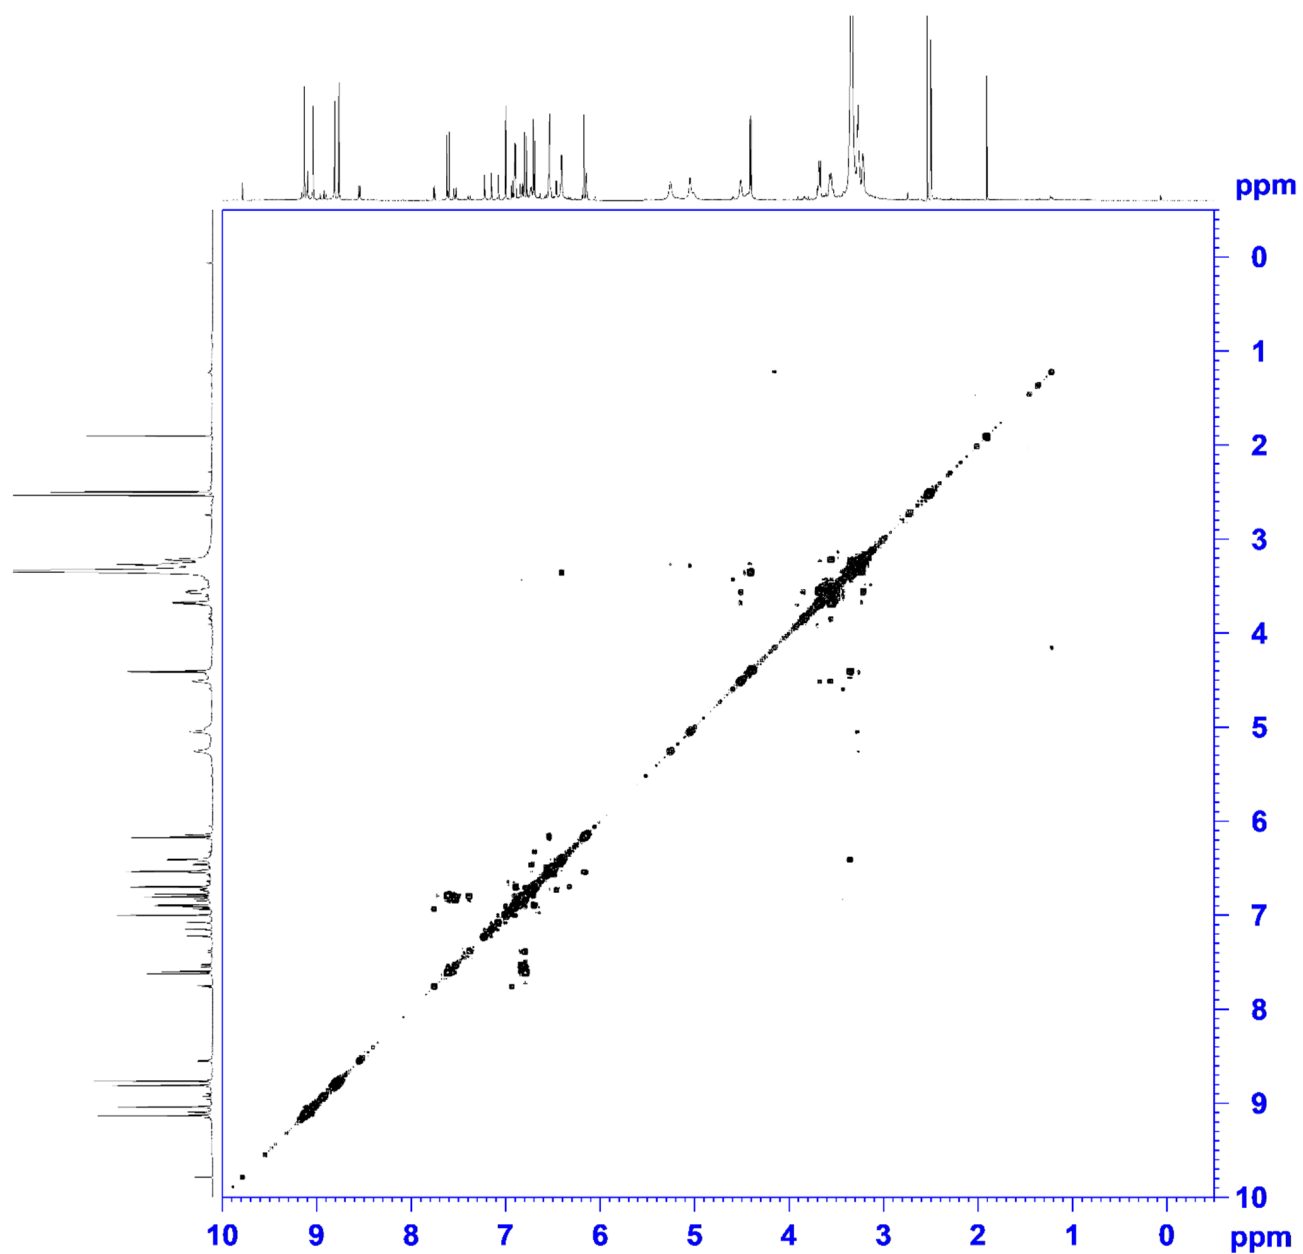

**Figure S7.**  $^1\text{H}$ - $^1\text{H}$  COSY-NMR spectrum (700 MHz,  $\text{DMSO}-d_6$ ) of the PSG (1).

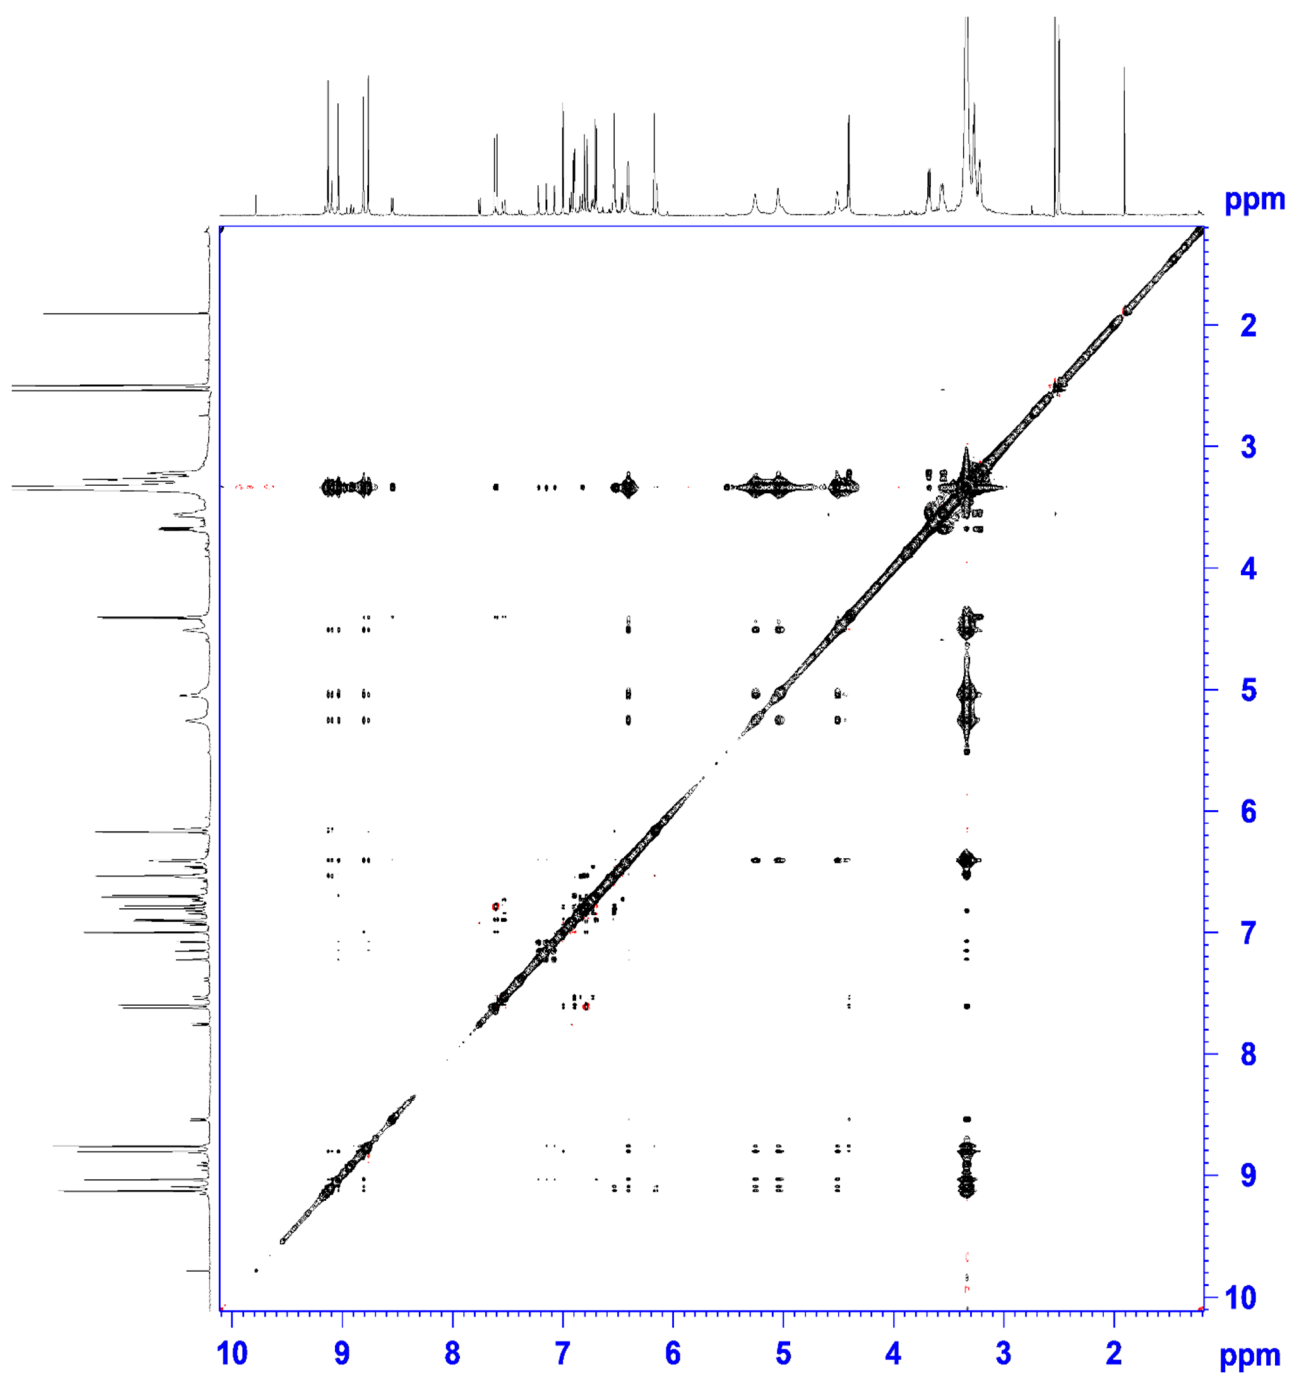

**Figure S8.**  $^1\text{H}$ - $^1\text{H}$  NOESY-NMR spectrum (700 MHz,  $\text{DMSO-}d_6$ ) of the PSG (1).

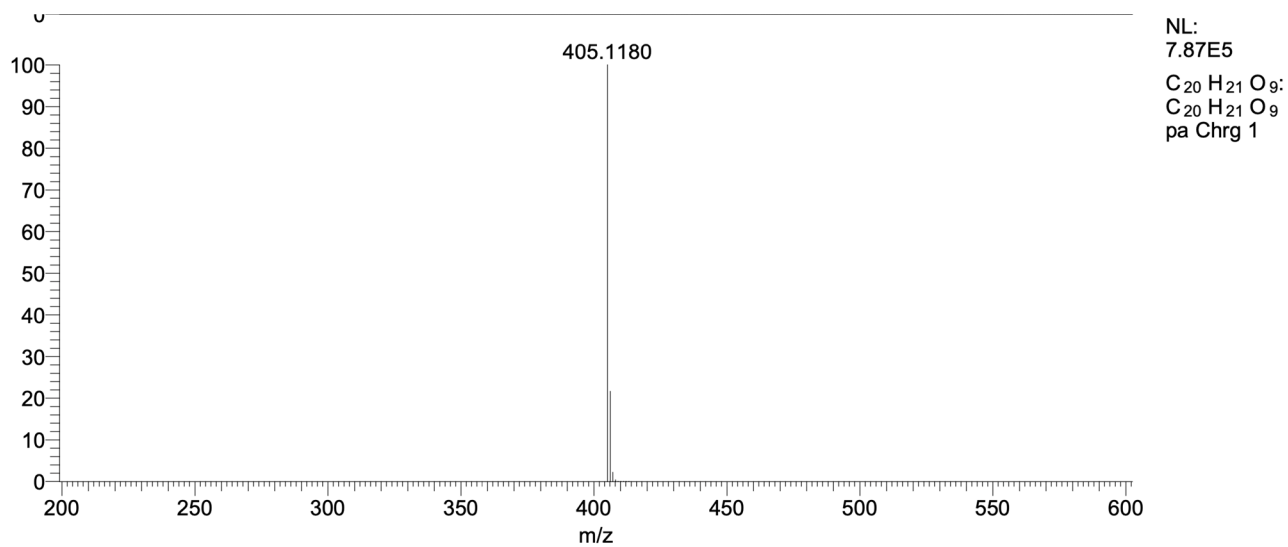

**Figure S9.** The high-resolution mass analysis of TSG at the negative mode. A significant signal at  $m/z$  405.1180.
